# Supplementary material for: Amino-alcohol functionalized porous polymer coupled with chromium hydroxide nanoparticles for efficient Cd(ii) adsorption from aqueous solutions
Source: Royal Society of Chemistry journal article supplement (doi:10.1039/d4ra08579e), 2025-01-01
Supplement: d4ra08579e1.pdf [file d4ra08579e1.pdf]

## **Supplementary Information**

### **Amino-Alcohol functionalized porous polymer coupled with nanoparticles of metal hydroxide for efficient adsorption of Cd(II) from wastewater**

*Hamida Y. Mostafa*<sup>1</sup>, *Ahmed M. Masoud*<sup>2</sup>, *Adel A. El-Zahhar*<sup>3</sup>, *Majed M. Alghamdi*<sup>3</sup>, *Entsar H. Taha*<sup>4</sup>,  
*Ahmed M.A. El Naggari*<sup>1\*</sup>, *Mohamed H. Taha*<sup>2</sup>

<sup>1</sup> Egyptian Petroleum Research Institute (EPRI), Nasr City, 11727, Cairo- Egypt

<sup>2</sup> Nuclear Materials Authority, P.O. Box 530, El Maadi, Cairo-Egypt

<sup>3</sup> Department of Chemistry, Faculty of Science, King Khalid University, Abha 9004, Saudi Arabia

<sup>4</sup> Department of Plant Protection, Faculty of Agriculture, Ain Shams University

\* Corresponding author: [drmeto1979@yahoo.com](mailto:drmeto1979@yahoo.com)

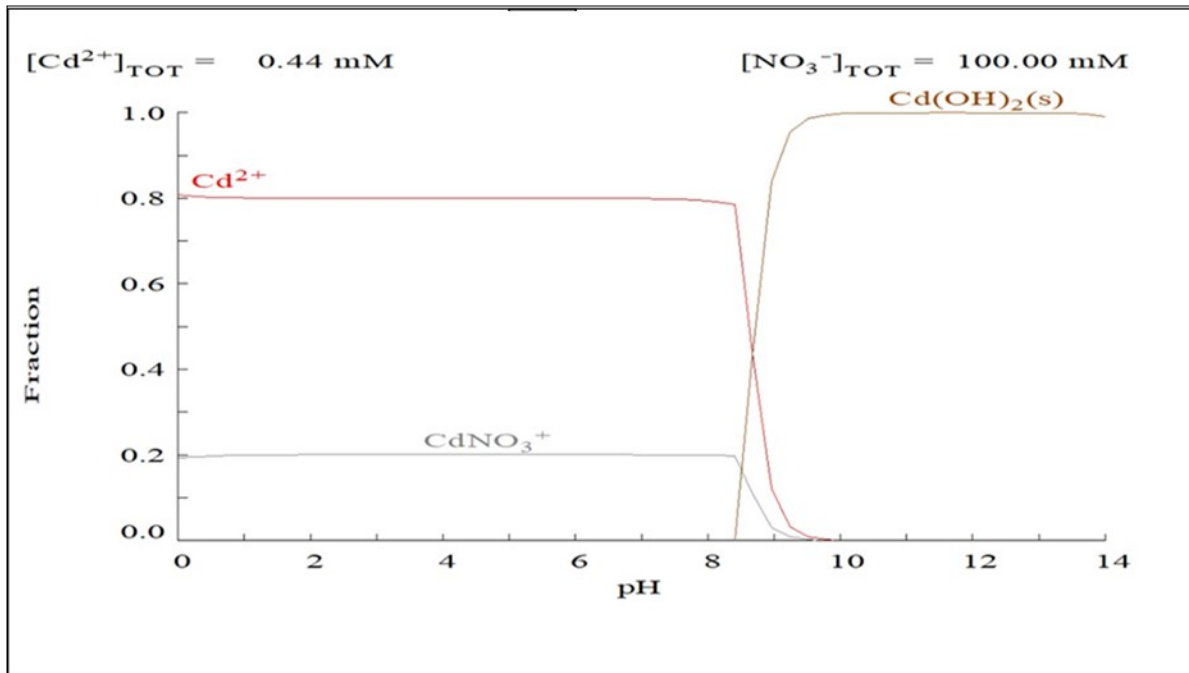

**Figure S1:** Expected aqueous speciation of metal ion concentration ( $50 \text{ mg L}^{-1}$ ) for cadmium as a function of pH using Medusa/Hydra program.

**Table S1: Kinetic, isotherm, and fitting equations for Cd(II) adsorption process [1-8].**

| Kinetics                             | Equations                                                              |
|--------------------------------------|------------------------------------------------------------------------|
| Pseudo-first-order                   | $q_t = q_1(1 - e^{-k_1t})$                                             |
| Pseudo-second-order                  | $q_t = \frac{1}{(1   k_2q_2^2) + (t   q_2)}$                           |
| Intra-particle diffusion model (IPD) | $q_t = K_{id}t^{0.5} + C_i$                                            |
| Isotherms                            | Equations                                                              |
| Langmuir model                       | $q_e = \frac{q_m k_L C_e}{1 + k_L C_e}$                                |
| Freundlich model                     | $q_e = K_F C_e^{1/n_F}$                                                |
| Dubinin-Radushkevich (D_R) model     | $\ln q_e = \ln q_s + K_{ad} \varepsilon^2$                             |
| Sips model                           | $q_e = \frac{q_s (k_S C_e)^{mS}}{1 + (k_S C_e)^{mS}}$                  |
| Fitting                              | Equations                                                              |
| Average relative error (ARE)         | $ARE = \frac{100}{n} \sum_1^n \frac{ q_{exp} - q_{pred} }{q_{exp}}$    |
| Chi-square coefficient ( $\chi^2$ )  | $\chi^2 = \sum \left[ \frac{(q_{exp} - q_{pred})^2}{q_{pred}} \right]$ |

$q_e$  (mg g<sup>-1</sup>) is the equilibrium concentration of metal ions, and  $q_t$  (mg g<sup>-1</sup>) is the adsorbed amount of metal ions after time  $t$  (min),  $C_e$  (mg L<sup>-1</sup>) is equilibrium concentration of metal ions.  $k_1$  (min<sup>-1</sup>) and  $k_2$  (min<sup>-1</sup>) are the rate constants for the pseudo first and second order, respectively.  $K_{id}$  (mg/g. min<sup>0.5</sup>) is a rate constant, and  $C$  is the thickness of the boundary layer.  $q_m$  and  $q_s$  are the maximum sorption capacity (mg. g<sup>-1</sup>) of Langmuir and Sips models.  $k_L$  (L. mg<sup>-1</sup>),  $K_F$  (L/ mg),  $K_{ad}$  (mol<sup>2</sup>/J<sup>2</sup>), and  $K_S$  (L/ mg) are represent the constants of Langmuir, Freundlich, Dubinin–Radushkevich, and Sips models.  $n$  refer to the sorption intensity,  $mS$  is Sips constant.  $q_s$  is the theoretical isotherm saturation capacity (mg/g). The mean sorption energy ( $E_{DR}$ ) which equals  $(1/\sqrt{2}K_{ad})$ ;  $\varepsilon$  is Dubinin–Radushkevich isotherm constant and equal  $(RT \ln(1 + 1/C_e))$  [6-7].  $AER$  and  $\chi^2$  are the relative error and Chi-square coefficients respectively, the number of test points is  $n$ , the experimental equilibrium capacity is  $q_{exp}$  (mg g<sup>-1</sup>), while the predicted capacity is  $q_{pred}$  (mg g<sup>-1</sup>).

## **References:**

- 1) Hu, Q., Pang, S. and Wang, D., 2022. In-depth insights into mathematical characteristics, selection criteria and common mistakes of adsorption kinetic models: a critical review. *Separation & Purification Reviews*, 51(3), pp.281-299.
- 2) Yao, C. and Chen, T., 2017. A film-diffusion-based adsorption kinetic equation and its application. *Chemical Engineering Research and Design*, 119, pp.87-92.
- 3) Elzoghby, A., Fahmy, H., Taha, M. and Ibrahim, S., 2023. Active carbon-based waste packaging materials for uranium sorption from aqueous solution. *Environmental Science and Pollution Research*, pp.1-16.
- 4) Wang, J. and Guo, X., 2020. Adsorption isotherm models: Classification, physical meaning, application and solving method. *Chemosphere*, 258, p.127279.
- 5) Al-Ghouti, M.A. and Da'ana, D.A., 2020. Guidelines for the use and interpretation of adsorption isotherm models: A review. *Journal of hazardous materials*, 393, p.122383.
- 6) Abou-Hadid, A.F., El-Behairy, U.A., Elmalih, M.M., Amdeha, E., El Naggar, A.M., Taha, M.H. and Hussein, A.E., 2022. Production of efficient carbon fiber from different solid waste residuals for adsorption of hazardous metals from wastewater samples. *Biomass Conversion and Biorefinery*, pp.1-16.
- 7) Saleh, T.A., 2022. Kinetic models and thermodynamics of adsorption processes: classification. In *Interface Science and Technology* (Vol. 34, pp. 65-97). Elsevier.
- 8) A.A. Younes, A.M. Masoud, M.H. Taha, Amino-functionalised cross-linked polyacrylamide for the adsorption of U(VI) ions from contaminated aqueous solutions, *Int. J. Environ. Anal. Chem.* (2021). <https://doi.org/10.1080/03067319.2021.2003348>.

**Table S2:** *The values of the applied Weber and Morris kinetic model parameters*

|                                                  | <b>PS</b> | <b>EA-PS</b> | <b>Cr@EA-PS</b> |
|--------------------------------------------------|-----------|--------------|-----------------|
| <b>Weber and Morris model</b>                    |           |              |                 |
| <b><math>k_i</math> (mg/g min<sup>1/2</sup>)</b> | 0.04      | 0.05         | 0.11            |
| <b>C</b>                                         | 0.01      | 0.41         | 9.28            |
| <b>R<sup>2</sup></b>                             | 0.99      | 0.99         | 0.99            |

**Table S3:** *Sorption and desorption efficiencies (%) for five successive cycles.*

|               | <b>Sorption, %</b> | <b>Desorption, %</b> |
|---------------|--------------------|----------------------|
| <b>Run #1</b> | 93.2               | 93.4                 |
| <b>Run #2</b> | 92.8               | 93.1                 |
| <b>Run #3</b> | 91.3               | 92.1                 |
| <b>Run #4</b> | 90.7               | 91.3                 |
| <b>Run #5</b> | 90.1               | 90.4                 |
